# Supplementary material
Source: PubMed Central journal article supplement (PMC5096987)
Supplement: NIHMS799652-supplement-Supp_Info.pdf [file NIHMS799652-supplement-Supp_Info.pdf]

# Supplementary Materials for “A Note on Posterior Predictive Checks to Assess Model Fit for Incomplete Data”

Dandan Xu<sup>1</sup>, Arkendu Chatterjee<sup>2</sup>, Michael J. Daniels<sup>3,\*</sup>

<sup>1</sup>Department of Statistics, University of Florida, Gainesville, FL 32611

<sup>2</sup>Novartis, East Hanover, NJ 07936

<sup>3</sup>Department of Statistics and Data Science, The University of Texas, Austin, TX 78712

*\*email:* [mjdaniels@austin.utexas.edu](mailto:mjdaniels@austin.utexas.edu)

### Derivation of the posterior predictive probability for the observed replication from Section 3

We derive the posterior predictive probability for the observed replication using the model in Section 3. We only consider a prior distribution for the regression parameter,  $\alpha$ ,  $\alpha \sim N(0, \nu^2)$  for simplification and keep the other regression parameters fixed. First we derive the posterior distribution of  $\alpha$ ,

$$\begin{aligned} p(\alpha | \mathbf{y}_{\text{obs}}, \mathbf{r}_2) &\propto \exp\left[-\frac{1}{2\nu^2}\alpha^2\right] \cdot \exp\left[-\frac{1}{2\tau^2}\sum_{i=1}^{n_1}(y_{2i} - \alpha - \phi y_{1i})^2\right] \\ &\propto \exp\left[-\frac{1}{2}\left(\frac{n_1}{\tau^2} + \frac{1}{\nu^2}\right)\left(\alpha - \frac{\sum_{i=1}^{n_1} y_{2i} - \phi \sum_{i=1}^{n_1} y_{1i}}{\frac{n_1}{\tau^2} + \frac{1}{\nu^2}}\right)^2\right]. \end{aligned}$$

Thus,

$$\alpha | \mathbf{y}_{\text{obs}}, \mathbf{r}_2 \sim N\left(\frac{n_1\nu^2(\bar{y}_{2,\text{obs}} - \phi\bar{y}_{1,\text{obs}})}{\tau^2 + n_1\nu^2}, \frac{\tau^2\nu^2}{\tau^2 + n_1\nu^2}\right).$$

Note that,

$$\begin{aligned} y_{2,\text{obs}}^{\text{rep}} | y_1^{\text{rep}}, r_{2i}^{\text{rep}} = 1, \alpha &\sim N(\alpha + \phi y_1^{\text{rep}}, \tau^2) \\ y_1^{\text{rep}} | r_{2i}^{\text{rep}} = 1 &\sim N(\mu + \xi, \sigma_2^2) \\ \Rightarrow y_{2,\text{obs}}^{\text{rep}} | r_{2i}^{\text{rep}} = 1, \alpha &\sim N(\alpha + \phi(\mu + \xi), \tau^2 + \phi^2\sigma_2^2). \end{aligned}$$

Now define  $\bar{y}_{2,\text{obs}}^{\text{rep}} = \frac{1}{\sum I(r_{2i}^{\text{rep}}=1)} \sum_{i=1}^n y_{2i}^{\text{rep}} I(r_{2i}^{\text{rep}} = 1)$ . Let  $N = \sum I(r_{2i}^{\text{rep}} = 1) \sim \text{Binomial}(n, \eta)$  and assume the data are sorted so that the objects with missing values are at the end. So  $\bar{y}_{2,\text{obs}}^{\text{rep}} = \frac{1}{N} \sum_{i=1}^N y_{2,\text{obs},i}^{\text{rep}}$ . Thus,

$$\begin{aligned} \bar{y}_{2,\text{obs}}^{\text{rep}} | N, \alpha &\sim N\left(\alpha + \phi(\mu + \xi), \frac{\tau^2 + \phi^2\sigma_2^2}{N}\right). \\ \text{Since, } \alpha | \mathbf{y}_{\text{obs}}, \mathbf{r}_2 &\sim N\left(\frac{n_1\nu^2(\bar{y}_{2,\text{obs}} - \phi\bar{y}_{1,\text{obs}})}{\tau^2 + n_1\nu^2}, \frac{\tau^2\nu^2}{\tau^2 + n_1\nu^2}\right) \\ \Rightarrow \bar{y}_{2,\text{obs}}^{\text{rep}} | N, \mathbf{y}_{\text{obs}}, \mathbf{r}_2 &\sim N\left(\frac{n_1\nu^2(\bar{y}_{2,\text{obs}} - \phi\bar{y}_{1,\text{obs}})}{\tau^2 + n_1\nu^2} + \phi(\mu + \xi), \frac{\tau^2 + \phi^2\sigma_2^2}{N} + \frac{\tau^2\nu^2}{\tau^2 + n_1\nu^2}\right). \end{aligned}$$

Therefore, in finite samples,  $\bar{y}_{2,\text{obs}}^{\text{rep}} | \mathbf{y}_{\text{obs}}, \mathbf{r}_2$  is a mixture of normals, which is given by

$$\sum_{k=1}^n \binom{n}{k} \eta^k (1-\eta)^{n-k} N\left(\frac{n_1\nu^2(\bar{y}_{2,\text{obs}} - \phi\bar{y}_{1,\text{obs}})}{\tau^2 + n_1\nu^2} + \phi(\mu + \xi), \frac{\tau^2 + \phi^2\sigma_2^2}{k} + \frac{\tau^2\nu^2}{\tau^2 + n_1\nu^2}\right).$$

To explore the large sample properties, we note that

$$\frac{N}{n} \xrightarrow{P} \eta.$$

By Slutsky's theorem,

$$\bar{y}_{2,\text{obs}}^{\text{rep}} | \mathbf{y}_{\text{obs}}, \mathbf{r}_2 \sim AN \left( \frac{n_1 \nu^2 (\bar{y}_{2,\text{obs}} - \phi \bar{y}_{1,\text{obs}})}{\tau^2 + n_1 \nu^2} + \phi(\mu + \xi), \frac{\tau^2 + \phi^2 \sigma_2^2}{n\eta} + \frac{\tau^2 \nu^2}{\tau^2 + n_1 \nu^2} \right),$$

where  $AN$  represents an asymptotically normal distribution. Using the above results we obtain,

$$\begin{aligned} P(\bar{y}_{2,\text{obs}}^{\text{rep}} > \bar{y}_{2,\text{obs}} | \mathbf{y}_{\text{obs}}, \mathbf{r}_2) &\approx \Phi \left( \frac{-\frac{\tau^2 \bar{y}_{2,\text{obs}} + n_1 \nu^2 \phi \bar{y}_{1,\text{obs}}}{\tau^2 + n_1 \nu^2} + \phi(\mu + \xi)}{\sqrt{\frac{\tau^2 + \phi^2 \sigma_2^2}{n\eta} + \frac{\tau^2 \nu^2}{\tau^2 + n_1 \nu^2}}} \right) \\ &= \Phi \left( \frac{-\frac{\tau^2}{\tau^2 + n_1 \nu^2} \sqrt{n_1} (\bar{y}_{2,\text{obs}} - \phi(\mu + \xi)) - \frac{n_1 \nu^2}{\tau^2 + n_1 \nu^2} \phi \sqrt{n_1} (\bar{y}_{1,\text{obs}} - (\mu + \xi))}{\sqrt{\frac{n_1}{n\eta} (\tau^2 + \phi^2 \sigma_2^2) + \frac{n_1 \tau^2 \nu^2}{\tau^2 + n_1 \nu^2}}} \right) \\ &= \Phi \left( \frac{-o_p(1)A - O_p(1)\phi B}{\sqrt{O_p(1)(\tau^2 + \phi^2 \sigma_2^2) + O_p(1)\tau^2}} \right) \\ &= \Phi \left( \frac{m}{\sqrt{V}} \right), \end{aligned}$$

where  $A = \sqrt{n_1}(\bar{y}_{2,\text{obs}} - \phi(\mu + \xi))$ ,  $B = \sqrt{n_1}(\bar{y}_{1,\text{obs}} - (\mu + \xi))$ ,  $m$  denotes the numerator, and  $V$  denotes the denominator.

### Derivation of the posterior predictive probability for the complete replication from Section 3

Here we derive the posterior predictive probability for the complete replication using the model in Section 3. As for observed replication, the prior distribution on the regression parameter  $\alpha$  is  $\alpha \sim N(0, \nu^2)$ .

Note that,

$$\begin{aligned} y_{2,\text{mis}}^{\text{rep}} | y_1^{\text{rep}}, r_{2i}^{\text{rep}} = 0, \alpha &\sim N(\alpha + \Delta + \phi y_1, \tau^2) \\ y_1^{\text{rep}} | r_{2i}^{\text{rep}} = 0 &\sim N(\mu, \sigma_1^2) \\ \Rightarrow y_{2,\text{mis}}^{\text{rep}} | r_{2i}^{\text{rep}} = 0, \alpha &\sim N(\alpha + \Delta + \phi \mu, \tau^2 + \phi^2 \sigma_1^2). \end{aligned}$$

Now define  $\bar{y}_{2,\text{com}}^{\text{rep}} = \frac{1}{n} \sum_{i=1}^n y_{2i}^{\text{rep}} = \frac{\sum_{i=1}^N y_{2\text{obs},i}^{\text{rep}} + \sum_{i=N+1}^n y_{2\text{mis},i}^{\text{rep}}}{n}$ , where  $N = \sum I(r_{2i}^{\text{rep}} = 1) \sim \text{Binomial}(n, \eta)$  and the data is sorted so that the objects with missing values are at the end. Thus,

$$\begin{aligned} \bar{y}_{2,\text{com}}^{\text{rep}} | N, \alpha &\sim N \left( \alpha + \phi \mu + \frac{N}{n} \phi \xi + \frac{n - N}{n} \Delta, \frac{n\tau^2 + N\phi^2 \sigma_2^2 + (n - N)\phi^2 \sigma_1^2}{n^2} \right) \text{ and} \\ \bar{y}_{2,\text{com}} | \mathbf{y}_{\text{obs}}, \alpha &\sim N \left( \frac{n_1 \bar{y}_{2,\text{obs}} + (n - n_1)(\alpha + \Delta + \phi \bar{y}_{1,\text{mis}})}{n}, \frac{(n - n_1)\tau^2}{n^2} \right) \\ \Rightarrow \bar{y}_{2,\text{com}}^{\text{rep}} - \bar{y}_{2,\text{com}} | N, \mathbf{y}_{\text{obs}}, \alpha &\sim N \left( \frac{n_1 \alpha + n\phi \mu + N\phi \xi + (n_1 - N)\Delta - n_1 \bar{y}_{2,\text{obs}} - (n - n_1)\phi \bar{y}_{1,\text{mis}}}{n}, \right. \\ &\quad \left. \frac{(2n - n_1)\tau^2 + N\phi^2 \sigma_2^2 + (n - N)\phi^2 \sigma_1^2}{n^2} \right). \end{aligned}$$

Since,  $\alpha | \mathbf{y}_{\text{obs}}, \mathbf{r}_2 \sim N \left( \frac{n_1 \nu^2 (\bar{y}_{2,\text{obs}} - \phi \bar{y}_{1,\text{obs}})}{\tau^2 + n_1 \nu^2}, \frac{\tau^2 \nu^2}{\tau^2 + n_1 \nu^2} \right)$

$\Rightarrow \bar{y}_{2,\text{com}}^{\text{rep}} - \bar{y}_{2,\text{com}} | N, \mathbf{y}_{\text{obs}}, \mathbf{r}_2 \sim N \left( \frac{n_1^2 \nu^2 (\bar{y}_{2,\text{obs}} - \phi \bar{y}_{1,\text{obs}})}{n(\tau^2 + n_1 \nu^2)} \right.$

$\left. + \frac{n\phi\mu + N\phi\xi + (n_1 - N)\Delta - n_1 \bar{y}_{2,\text{obs}} - (n - n_1)\phi \bar{y}_{1,\text{mis}}}{n}, \right.$

$\left. \frac{(2n - n_1)\tau^2 + N\phi^2\sigma_2^2 + (n - N)\phi^2\sigma_1^2}{n^2} + \frac{n_1^2\tau^2\nu^2}{n^2(\tau^2 + n_1\nu^2)} \right).$

Therefore, in finite samples,  $\bar{y}_{2,\text{com}}^{\text{rep}} - \bar{y}_{2,\text{com}} | \mathbf{y}_{\text{obs}}, \mathbf{r}_2$  is a mixture of normals. In the large sample case, since  $\frac{N}{n} \xrightarrow{P} \eta$  and  $\frac{N}{n} \sim AN(\eta, \frac{\eta(1-\eta)}{n})$ , we can show that

$$\bar{y}_{2,\text{com}}^{\text{rep}} - \bar{y}_{2,\text{com}} | \mathbf{y}_{\text{obs}}, \mathbf{r}_2 \sim AN \left( \frac{n_1^2 \nu^2 (\bar{y}_{2,\text{obs}} - \phi \bar{y}_{1,\text{obs}})}{n(\tau^2 + n_1 \nu^2)} + \frac{n\phi\mu + n\eta\phi\xi + (n_1 - n\eta)\Delta - n_1 \bar{y}_{2,\text{obs}} - (n - n_1)\phi \bar{y}_{1,\text{mis}}}{n}, \right.$$

$$\left. \frac{(2n - n_1)\tau^2 + n\eta\phi^2\sigma_2^2 + n\eta(1-\eta)(\Delta - \phi\xi)^2 + (n - n\eta)\phi^2\sigma_1^2}{n^2} + \frac{n_1^2\tau^2\nu^2}{n^2(\tau^2 + n_1\nu^2)} \right).$$

Using the above results we obtain,

$$P(\bar{y}_{2,\text{com}}^{\text{rep}} > \bar{y}_{2,\text{com}} | \mathbf{y}_{\text{obs}}, \mathbf{r}_2)$$

$$\approx \Phi \left( \frac{-\frac{\tau^2}{\tau^2 + n_1 \nu^2} \sqrt{n_1} (\bar{y}_{2,\text{obs}} - \phi(\mu + \xi)) - \frac{n_1 \nu^2}{\tau^2 + n_1 \nu^2} \phi \sqrt{n_1} (\bar{y}_{1,\text{obs}} - (\mu + \xi)) + \sqrt{\frac{n}{n_1}} \frac{n_1 - n\eta}{\sqrt{n}} (\Delta - \phi\xi) + \sqrt{\frac{n - n_1}{n_1}} \phi \sqrt{n - n_1} (\mu - \bar{y}_{1,\text{mis}})}{\sqrt{\frac{n_1}{n\eta} (\tau^2 + \phi^2\sigma_2^2) + \frac{n_1 \tau^2 \nu^2}{\tau^2 + n_1 \nu^2} + \frac{n\eta}{n_1} (1 - \eta) (\Delta - \phi\xi)^2 + \tau^2 \left( \frac{2n - n_1}{n_1} - \frac{n_1}{n\eta} \right) + \phi^2 \sigma_2^2 \left( \frac{n\eta}{n_1} - \frac{n_1}{n\eta} \right) + \phi^2 \sigma_1^2 \frac{n - n\eta}{n_1}}}} \right)$$

$$= \Phi \left( \frac{-o_p(1)A - O_p(1)\phi B + O_p(1)\frac{1}{\sqrt{\eta}}(\Delta - \phi\xi)C - O_p(1)\sqrt{\frac{1-\eta}{\eta}}\phi D}{\sqrt{O_p(1)(\tau^2 + \phi^2\sigma_2^2) + O_p(1)\tau^2 + O_p(1)(1 - \eta)(\Delta - \phi\xi)^2 + O_p(1)\frac{2(1-\eta)}{\eta}\tau^2 + o_p(1)\phi^2\sigma_2^2 + O_p(1)\frac{1-\eta}{\eta}\phi^2\sigma_1^2}} \right),$$

where  $C = \frac{n_1 - n\eta}{\sqrt{n}}$  and  $D = \sqrt{n - n_1}(\bar{y}_{1,\text{mis}} - \mu)$ .

### WinBUGS code for the posterior predictive checks in Section 3

```
model{
##### likelihood (sigma1,sigma2 and tau are standard deviation)
for (i in 1:n)
{
  r2[i]~dbern(eta)
  y[i,1]~dnorm(mu+xi*r2[i], 1/sigma2^2*r2[i]+1/sigma1^2*(1-r2[i]))
  y[i,2]~dnorm(alpha+phi*y[i,1]+delta*(1-r2[i]), 1/tau^2)
}
##### prior
  alpha~dnorm(0,0.00001)
##### known (fixed) parameters
  eta<-param[1]
  mu<-param[2]
  xi<-param[3]
  sigma1<-param[4]
  sigma2<-param[5]
  phi<-param[6]
  delta<-param[7]
  tau<-param[8]
#### predictive replicates
for (i in 1:n)
{
  r2pred[i]~dbern(eta)
  ypred[i,1]~dnorm(mu+xi*r2pred[i], 1/sigma2^2*r2pred[i]+1/sigma1^2*(1-r2pred[i]))
  ypred[i,2]~dnorm(alpha+phi*ypred[i,1]+delta*(1-r2pred[i]), 1/tau^2)
}
#### posterior predictive check based on observed data
check_obs<-step(sum(ypred[,2]*r2pred)-sum(y[,2]*r2)/sum(r2)*sum(r2pred))
#### posterior predictive check based on complete data
#check_com<-step(sum(ypred[,2])-sum(y[,2]))
}
```

### WinBUGS code for the posterior predictive checks in Section 4

The observed data ( $\mathbf{y}, \mathbf{r}_2$ ) are sorted so that the subjects in the EG group are ordered before those in the EP group.

```

model{
  ##### likelihood (sigma1,sigma2 and tau are precision)
  for (i in 1:78)
  {
    r2[i]~dbern(eta)
    y[i,1]~dnorm(mu+xi*r2[i], sigma2*r2[i]+sigma1*(1-r2[i]))
    y[i,2]~dnorm(alpha+phi*y[i,1]+delta*(1-r2[i]), tau)
  }
  ##### prior
  alpha~dnorm(0,0.00001)
  eta~dbeta(1,1)
  mu~dnorm(0,0.00001)
  xi~dnorm(0,0.00001)
  sigma1~dgamma(.01,.01)
  sigma2~dgamma(.01,.01)
  tau~dgamma(.01,.01)
  phi~dnorm(0,0.00001)

  ##### posterior predictive replicates
  for (i in 1:n)
  {
    r2pred[i]~dbern(eta)
    ypred[i,1]~dnorm(mu+xi*r2pred[i], sigma2*r2pred[i]+sigma1*(1-r2pred[i]))
    ypred[i,2]~dnorm(alpha+phi*ypred[i,1]+delta*(1-r2pred[i]),tau)
  }
  ##### posterior predictive checks for EG based on observed data and complete data replications

  check_obs_EG<-step(sum(ypred[1:38,2]*r2pred[1:38])-sum(y[1:38,2]*r2[1:38])/
    sum(r2[1:38])*sum(r2pred[1:38]))

  check_com_EG<-step(sum(ypred[1:38,2])-sum(y[1:38,2]))

  ##### posterior predictive checks for EP based on observed data and complete data replications

  check_obs_EP<-step(sum(ypred[39:78,2]*r2pred[39:78])-sum(y[39:78,2]*r2[39:78])/
    sum(r2[39:78])*sum(r2pred[39:78]))

  check_com_EP<-step(sum(ypred[39:78,2])-sum(y[39:78,2]))

```

```
#### marginal means of Y_1 and Y_2
mean_y1<-mu+eta*xi
mean_y2<-alpha+phi*(mu+eta*xi)+(1-eta)*delta
}
```
